# Supplementary material
Source: PubMed Central journal article supplement (PMC4755858)
Supplement: NIHMS754724-supplement-Supplemental.pdf [file NIHMS754724-supplement-Supplemental.pdf]

# Nuclease-resistant c-di-AMP derivatives that differentially recognize RNA and protein receptors

*Robert E. Meehan,<sup>†</sup> Chad D. Torgerson,<sup>†</sup> Barbara L. Gaffney,<sup>§</sup> Roger A. Jones,<sup>§</sup> and Scott A.*

*Strobel<sup>\*†,‡</sup>*

<sup>†</sup>Department of Chemistry and <sup>‡</sup> Department of Molecular Biophysics and Biochemistry, Yale University, New Haven, Connecticut 06520, United States

<sup>§</sup>Department of Chemistry and Chemical Biology, Rutgers, The State University of New Jersey, Piscataway, New Jersey 08854, United States

## **ASSOCIATED CONTENT**

### **Supporting Information**

Supplemental results, including four figures, two tables, and one scheme as described in the text.

This material is available free of charge via the Internet at <http://pubs.acs.org>.

## **AUTHOR INFORMATION**

### **Corresponding Author**

\*Phone: (203) 432-9772. Fax (203) 432-5767. E-mail: [scott.strobel@yale.edu](mailto:scott.strobel@yale.edu)

### **Funding Sources**

This work was supported by National Institutes of Health Grant GM022778 to S.A.S and National Institutes of Health Grant GM79760 to R.A.J.

### **Notes**

The authors declare no competing financial interests.

## **ACKNOWLEDGEMENTS**

We would like to thank Dave Hiller, Katie Smith, Brian Dunican, and Michelle Legaspi for helpful discussion and critical comments on the manuscript, and Michelle Legaspi for preliminary work on the analog degradation assays. We would also like to thank the West Campus Analytical Core at Yale University for use of their NMR facility

## **ABBREVIATIONS**

c-di-AMP, (3'-5')-cyclic diadenosine monophosphate; c-di-GMP, (3'-5')-cyclic diguanosine monophosphate; c-AMP-GMP, (3'-5')-cyclic adenosine monophosphate-guanosine monophosphate; DAC, diadenylate cyclase; PDE, phosphodiesterase; PDB, Protein Data Bank.

## REFERENCES

- (1) Galperin, M. Y. (2004) Bacterial signal transduction network in a genomic perspective. *Environ. Microbiol.* 6, 552–567.
- (2) Römling, U., Gomelsky, M., and Galperin, M. Y. (2005) C-di-GMP: the dawning of a novel bacterial signalling system. *Mol. Microbiol.* 57, 629–639.
- (3) Romling, U. (2008) Great Times for Small Molecules: c-di-AMP, a Second Messenger Candidate in Bacteria and Archaea. *Sci. Signal.* 1, pe39.
- (4) Kalia, D., Merey, G., Nakayama, S., Zheng, Y., Zhou, J., Luo, Y., Guo, M., Roembke, B. T., and Sintim, H. O. (2013) Nucleotide, c-di-GMP, c-di-AMP, cGMP, cAMP, (p)ppGpp signaling in bacteria and implications in pathogenesis. *Chem. Soc. Rev.* 42, 305.
- (5) Witte, G., Hartung, S., Büttner, K., and Hopfner, K.-P. (2008) Structural Biochemistry of a Bacterial Checkpoint Protein Reveals Diadenylate Cyclase Activity Regulated by DNA Recombination Intermediates. *Mol. Cell* 30, 167–178.
- (6) Corrigan, R. M., and Gründling, A. (2013) Cyclic di-AMP: another second messenger enters the fray. *Nat. Rev. Microbiol.* 11, 513–524.
- (7) Oppenheimer-Shaanan, Y., Wexselblatt, E., Katzhendler, J., Yavin, E., and Ben-Yehuda, S. (2011) c-di-AMP reports DNA integrity during sporulation in *Bacillus subtilis*. *EMBO Rep.* 12, 594–601.

- (8) Corrigan, R. M., Abbott, J. C., Burhenne, H., Kaeber, V., and Gründling, A. (2011) c-di-AMP Is a New Second Messenger in *Staphylococcus aureus* with a Role in Controlling Cell Size and Envelope Stress. *PLoS Pathog* 7, e1002217.
- (9) Luo, Y., and Helmann, J. D. (2012) Analysis of the role of *Bacillus subtilis*  $\sigma^M$  in  $\beta$ -lactam resistance reveals an essential role for c-di-AMP in peptidoglycan homeostasis. *Mol. Microbiol.* 83, 623–639.
- (10) Pozzi, C., Waters, E. M., Rudkin, J. K., Schaeffer, C. R., Lohan, A. J., Tong, P., Loftus, B. J., Pier, G. B., Fey, P. D., Massey, R. C., and O’Gara, J. P. (2012) Methicillin Resistance Alters the Biofilm Phenotype and Attenuates Virulence in *Staphylococcus aureus* Device-Associated Infections. *PLoS Pathog* 8, e1002626.
- (11) Du, B., Ji, W., An, H., Shi, Y., Huang, Q., Cheng, Y., Fu, Q., Wang, H., Yan, Y., and Sun, J. (2014) Functional analysis of c-di-AMP phosphodiesterase, GdpP, in *Streptococcus suis* serotype 2. *Microbiol. Res.* 169, 749–758.
- (12) Cron, L. E., Stol, K., Burghout, P., van Selm, S., Simonetti, E. R., Bootsma, H. J., and Hermans, P. W. M. (2011) Two DHH Subfamily 1 Proteins Contribute to Pneumococcal Virulence and Confer Protection against Pneumococcal Disease. *Infect. Immun.* 79, 3697–3710.
- (13) Schwartz, K. T., Carleton, J. D., Quillin, S. J., Rollins, S. D., Portnoy, D. A., and Leber, J. H. (2012) Hyperinduction of Host Beta Interferon by a *Listeria monocytogenes* Strain Naturally Overexpressing the Multidrug Efflux Pump MdrT. *Infect. Immun.* 80, 1537–1545.
- (14) Yamamoto, T., Hara, H., Tsuchiya, K., Sakai, S., Fang, R., Matsuura, M., Nomura, T., Sato, F., Mitsuyama, M., and Kawamura, I. (2012) *Listeria monocytogenes* Strain-Specific Impairment of the TetR Regulator Underlies the Drastic Increase in Cyclic di-AMP Secretion and Beta Interferon-Inducing Ability. *Infect. Immun.* 80, 2323–2332.

- (15) Witte, C. E., Whiteley, A. T., Burke, T. P., Sauer, J.-D., Portnoy, D. A., and Woodward, J. J. (2013) Cyclic di-AMP Is Critical for *Listeria monocytogenes* Growth, Cell Wall Homeostasis, and Establishment of Infection. *mBio* 4, e00282–13.
- (16) Bai, Y., Yang, J., Eisele, L. E., Underwood, A. J., Koestler, B. J., Waters, C. M., Metzger, D. W., and Bai, G. (2013) Two DHH Subfamily 1 Proteins in *Streptococcus pneumoniae* Possess Cyclic Di-AMP Phosphodiesterase Activity and Affect Bacterial Growth and Virulence. *J. Bacteriol.* 195, 5123–5132.
- (17) Banerjee, R., Gretes, M., Harlem, C., Basuino, L., and Chambers, H. F. (2010) A mecA-Negative Strain of Methicillin-Resistant *Staphylococcus aureus* with High-Level  $\beta$ -Lactam Resistance Contains Mutations in Three Genes. *Antimicrob. Agents Chemother.* 54, 4900–4902.
- (18) Griffiths, J. M., and O'Neill, A. J. (2012) Loss of Function of the GdpP Protein Leads to Joint  $\beta$ -Lactam/Glycopeptide Tolerance in *Staphylococcus aureus*. *Antimicrob. Agents Chemother.* 56, 579–581.
- (19) Mehne, F. M. P., Gunka, K., Eilers, H., Herzberg, C., Kaefer, V., and Stülke, J. (2013) Cyclic Di-AMP Homeostasis in *Bacillus subtilis* BOTH LACK AND HIGH LEVEL ACCUMULATION OF THE NUCLEOTIDE ARE DETRIMENTAL FOR CELL GROWTH. *J. Biol. Chem.* 288, 2004–2017.
- (20) Ye, M., Zhang, J.-J., Fang, X., Lawlis, G. B., Troxell, B., Zhou, Y., Gomelsky, M., Lou, Y., and Yang, X. F. (2014) DhhP, a Cyclic di-AMP Phosphodiesterase of *Borrelia burgdorferi*, Is Essential for Cell Growth and Virulence. *Infect. Immun.* 82, 1840–1849.
- (21) Gándara, C., and Alonso, J. C. (2015) DisA and c-di-AMP act at the intersection between DNA-damage response and stress homeostasis in exponentially growing *Bacillus subtilis* cells. *DNA Repair* 27, 1–8.

- (22) Woodward, J. J., Iavarone, A. T., and Portnoy, D. A. (2010) c-di-AMP Secreted by Intracellular *Listeria monocytogenes* Activates a Host Type I Interferon Response. *Science* 328, 1703–1705.
- (23) Jin, L., Hill, K. K., Filak, H., Mogan, J., Knowles, H., Zhang, B., Perraud, A.-L., Cambier, J. C., and Lenz, L. L. (2011) MPYS Is Required for IFN Response Factor 3 Activation and Type I IFN Production in the Response of Cultured Phagocytes to Bacterial Second Messengers Cyclic-di-AMP and Cyclic-di-GMP. *J. Immunol.* 187, 2595–2601.
- (24) Parvatiyar, K., Zhang, Z., Teles, R. M., Ouyang, S., Jiang, Y., Iyer, S. S., Zaver, S. A., Schenk, M., Zeng, S., Zhong, W., Liu, Z.-J., Modlin, R. L., Liu, Y., and Cheng, G. (2012) The helicase DDX41 recognizes the bacterial secondary messengers cyclic di-GMP and cyclic di-AMP to activate a type I interferon immune response. *Nat. Immunol.* 13, 1155–1161.
- (25) Barker, J. R., Koestler, B. J., Carpenter, V. K., Burdette, D. L., Waters, C. M., Vance, R. E., and Valdivia, R. H. (2013) STING-Dependent Recognition of Cyclic di-AMP Mediates Type I Interferon Responses during *Chlamydia trachomatis* Infection. *mBio* 4, e00018–13.
- (26) Bai, Y., Yang, J., Zhou, X., Ding, X., Eisele, L. E., and Bai, G. (2012) Mycobacterium tuberculosis Rv3586 (DacA) Is a Diadenylate Cyclase That Converts ATP or ADP into c-di-AMP. *PLoS ONE* 7, e35206.
- (27) Rao, F., See, R. Y., Zhang, D., Toh, D. C., Ji, Q., and Liang, Z.-X. (2010) YybT Is a Signaling Protein That Contains a Cyclic Dinucleotide Phosphodiesterase Domain and a GGDEF Domain with ATPase Activity. *J. Biol. Chem.* 285, 473–482.
- (28) Huynh, T. N., Luo, S., Pensinger, D., Sauer, J.-D., Tong, L., and Woodward, J. J. (2015) An HD-domain phosphodiesterase mediates cooperative hydrolysis of c-di-AMP to affect bacterial growth and virulence. *Proc. Natl. Acad. Sci.* 112, E747–E756.

- (29) Zhang, L., Li, W., and He, Z.-G. (2013) DarR, a TetR-like Transcriptional Factor, Is a Cyclic Di-AMP-responsive Repressor in *Mycobacterium smegmatis*. *J. Biol. Chem.* 288, 3085–3096.
- (30) Corrigan, R. M., Campeotto, I., Jeganathan, T., Roelofs, K. G., Lee, V. T., and Gründling, A. (2013) Systematic identification of conserved bacterial c-di-AMP receptor proteins. *Proc. Natl. Acad. Sci.*
- (31) Bai, Y., Yang, J., Zarrella, T. M., Zhang, Y., Metzger, D. W., and Bai, G. (2014) Cyclic Di-AMP Impairs Potassium Uptake Mediated by a Cyclic Di-AMP Binding Protein in *Streptococcus pneumoniae*. *J. Bacteriol.* 196, 614–623.
- (32) Sureka, K., Choi, P. H., Precit, M., Delince, M., Pensinger, D. A., Huynh, T. N., Jurado, A. R., Goo, Y. A., Sadilek, M., Iavarone, A. T., Sauer, J.-D., Tong, L., and Woodward, J. J. (2014) The Cyclic Dinucleotide c-di-AMP Is an Allosteric Regulator of Metabolic Enzyme Function. *Cell* 158, 1389–1401.
- (33) Campeotto, I., Zhang, Y., Mladenov, M. G., Freemont, P. S., and Gründling, A. (2015) Complex Structure and Biochemical Characterization of the *Staphylococcus aureus* Cyclic Diadenylate Monophosphate (c-di-AMP)-binding Protein PstA, the Founding Member of a New Signal Transduction Protein Family. *J. Biol. Chem.* 290, 2888–2901.
- (34) Müller, M., Hopfner, K.-P., and Witte, G. (2015) c-di-AMP recognition by *Staphylococcus aureus* PstA. *FEBS Lett.* 589, 45–51.
- (35) Gundlach, J., Dickmanns, A., Schröder-Tittmann, K., Neumann, P., Kaesler, J., Kampf, J., Herzberg, C., Hammer, E., Schwede, F., Kaefer, V., Tittmann, K., Stülke, J., and Ficner, R. (2015) Identification, Characterization, and Structure Analysis of the Cyclic di-AMP-binding PII-like Signal Transduction Protein DarA. *J. Biol. Chem.* 290, 3069–3080.

- (36) Choi, P. H., Sureka, K., Woodward, J. J., and Tong, L. (2015) Molecular basis for the recognition of cyclic-di-AMP by PstA, a PII-like signal transduction protein. *MicrobiologyOpen* 4, 361–374.
- (37) Kim, H., Youn, S.-J., Kim, S. O., Ko, J., Lee, J.-O., and Choi, B.-S. (2015) Structural Studies of Potassium Transport Protein KtrA Regulator of Conductance of K<sup>+</sup> (RCK) C domain in Complex with Cyclic Diadenosine Monophosphate (c-di-AMP). *J. Biol. Chem.* jbc.M115.641340.
- (38) Mandal, M., and Breaker, R. R. (2004) Gene regulation by riboswitches. *Nat. Rev. Mol. Cell Biol.* 5, 451–463.
- (39) Winkler, W. C., and Breaker, R. R. (2005) Regulation of Bacterial Gene Expression by Riboswitches. *Annu. Rev. Microbiol.* 59, 487–517.
- (40) Barrick, J. E., and Breaker, R. R. (2007) The distributions, mechanisms, and structures of metabolite-binding riboswitches. *Genome Biol.* 8, R239.
- (41) Serganov, A., and Nudler, E. (2013) A decade of riboswitches. *Cell* 152, 17–24.
- (42) Breaker, R. R. (2012) Riboswitches and the RNA World. *Cold Spring Harb. Perspect. Biol.* 4.
- (43) Barrick, J. E., Corbino, K. A., Winkler, W. C., Nahvi, A., Mandal, M., Collins, J., Lee, M., Roth, A., Sudarsan, N., Jona, I., Wickiser, J. K., and Breaker, R. R. (2004) New RNA motifs suggest an expanded scope for riboswitches in bacterial genetic control. *Proc. Natl. Acad. Sci. U. S. A.* 101, 6421–6426.
- (44) Nelson, J. W., Sudarsan, N., Furukawa, K., Weinberg, Z., Wang, J. X., and Breaker, R. R. (2013) Riboswitches in eubacteria sense the second messenger c-di-AMP. *Nat Chem Biol* 9, 834–839.



- (45) Gao, A., and Serganov, A. (2014) Structural insights into recognition of c-di-AMP by the ydaO riboswitch. *Nat. Chem. Biol.* *10*, 787–792.
- (46) Ren, A., and Patel, D. J. (2014) c-di-AMP binds the ydaO riboswitch in two pseudo-symmetry-related pockets. *Nat. Chem. Biol.* *10*, 780–786.
- (47) Jones, C. P., and Ferré-D’Amaré, A. R. (2014) Crystal structure of a c-di-AMP riboswitch reveals an internally pseudo-dimeric RNA. *EMBO J.* *33*, 2692–2703.
- (48) Nissen, P., Ippolito, J. A., Ban, N., Moore, P. B., and Steitz, T. A. (2001) RNA tertiary interactions in the large ribosomal subunit: The A-minor motif. *Proc. Natl. Acad. Sci.* *98*, 4899–4903.
- (49) Shanahan, C. A., Gaffney, B. L., Jones, R. A., and Strobel, S. A. (2011) Differential analogue binding by two classes of c-di-GMP riboswitches. *J. Am. Chem. Soc.* *133*, 15578–15592.
- (50) Wang, J., Zhou, J., Donaldson, G. P., Nakayama, S., Yan, L., Lam, Y., Lee, V. T., and Sintim, H. O. (2011) Conservative Change to the Phosphate Moiety of Cyclic Diguanylic Monophosphate Remarkably Affects Its Polymorphism and Ability To Bind DGC, PDE, and PilZ Proteins. *J. Am. Chem. Soc.* *133*, 9320–9330.
- (51) Luo, Y., Zhou, J., Watt, S. K., Lee, V. T., Dayie, T. K., and Sintim, H. O. (2012) Differential binding of 2' -biotinylated analogs of c-di-GMP with c-di-GMP riboswitches and binding proteins. *Mol. Biosyst.* *8*, 772–778.
- (52) Smith, K. D., Lipchock, S. V., Ames, T. D., Wang, J., Breaker, R. R., and Strobel, S. A. (2009) Structural basis of ligand binding by a c-di-GMP riboswitch. *Nat. Struct. Mol. Biol.* *16*, 1218–1223.

- (53) Scaringe, S. A. (2001) RNA Oligonucleotide Synthesis via 5' -Silyl-2' -Orthoester Chemistry. *Methods* 23, 206–217.
- (54) Gaffney, B. L., Veliath, E., Zhao, J., and Jones, R. A. (2010) One-Flask Syntheses of c-di-GMP and the [Rp,Rp] and [Rp,Sp] Thiophosphate Analogues. *Org. Lett.* 12, 3269–3271.
- (55) Hill, A. (1910) The possible effects of the aggregation of the molecules of haemoglobin on its dissociation curves. *J Physiol Lond* 40, 4–7.
- (56) Antson, A. A., Otridge, J., Brzozowski, A. M., Dodson, E. J., Dodson, G. G., Wilson, K. S., Smith, T. M., Yang, M., Kurecki, T., and Gollnick, P. (1995) The structure of trp RNA-binding attenuation protein. *Nature* 374, 693–700.
- (57) Mandal, M., Lee, M., Barrick, J. E., Weinberg, Z., Emilsson, G. M., Ruzzo, W. L., and Breaker, R. R. (2004) A Glycine-Dependent Riboswitch That Uses Cooperative Binding to Control Gene Expression. *Science* 306, 275–279.
- (58) Trausch, J. J., Ceres, P., Reyes, F. E., and Batey, R. T. (2011) The Structure of a Tetrahydrofolate-Sensing Riboswitch Reveals Two Ligand Binding Sites in a Single Aptamer. *Structure* 19, 1413–1423.
- (59) Yoshizawa, S., Fourmy, D., and Puglisi, J. D. (1999) Recognition of the Codon-Anticodon Helix by Ribosomal RNA. *Science* 285, 1722–1725.
- (60) Lescoute, A., and Westhof, E. (2006) The A-minor motifs in the decoding recognition process. *Biochimie* 88, 993–999.
- (61) Seeman, N. C., Rosenberg, J. M., and Rich, A. (1976) Sequence-specific recognition of double helical nucleic acids by proteins. *Proc. Natl. Acad. Sci. U. S. A.* 73, 804–808.
- (62) Battle, D. J., and Doudna, J. A. (2002) Specificity of RNA–RNA helix recognition. *Proc. Natl. Acad. Sci. U. S. A.* 99, 11676–11681.

- (63) Davies, B. W., Bogard, R. W., Young, T. S., and Mekalanos, J. J. (2012) Coordinated Regulation of Accessory Genetic Elements Produces Cyclic Di-Nucleotides for *V. cholerae* Virulence. *Cell* 149, 358–370.
- (64) Uesugi, S., Miki, H., Ikehara, M., Iwahashi, H., and Kyogoku, Y. (1979) A linear relationship between electronegativity of 2' -substituents and conformation of adenine nucleosides. *Tetrahedron Lett.* 20, 4073–4076.
- (65) Micklefield, J. (2001) Backbone modification of nucleic acids: synthesis, structure and therapeutic applications. *Curr. Med. Chem.* 8, 1157–1179.
- (66) Shanahan, C. A., Gaffney, B. L., Jones, R. A., and Strobel, S. A. (2013) Identification of c-di-GMP Derivatives Resistant to an EAL Domain Phosphodiesterase. *Biochemistry (Mosc.)* 52, 365–377.
- (67) Frederick, C. A., Coll, M., Van der Marel, G. A., Van Boom, J. H., and Wang, A. H. J. (1988) Molecular structure of cyclic deoxydiadenylic acid at atomic resolution. *Biochemistry (Mosc.)* 27, 8350–8361.
- (68) Blommers, M. J., Haasnoot, C. A., Walters, J. A., van der Marel, G. A., van Boom, J. H., and Hilbers, C. W. (1988) Solution structure of the 3'-5' cyclic dinucleotide d(pApA). A combined NMR, UV melting, and molecular mechanics study. *Biochemistry (Mosc.)* 27, 8361–8369.
- (69) Blommers, M. J. J., Slot, H. J. B., van der Marel, G. A., van Boom, J. H., and Hilbers, C. W. (1990) Conformational Analysis of the 3' -5' -Cyclic Dinucleotide d by Means of Molecular Mechanics. *J. Biomol. Struct. Dyn.* 8, 233–251.
- (70) Frey, P. A., and Sammons, R. D. (1985) Bond order and charge localization in nucleoside phosphorothioates. *Science* 228, 541–545.

- (71) Forconi, M., and Herschlag, D. (2009) Chapter 15 - Use of Phosphorothioates to Identify Sites of Metal-Ion Binding in RNA, in *Methods in Enzymology* (Herschlag, D., Ed.), pp 311–333. Academic Press.
- (72) Wennmohs, F., Staemmler, V., and Schindler, M. (2003) Theoretical investigation of weak hydrogen bonds to sulfur. *J. Chem. Phys.* *119*, 3208–3218.
- (73) Zhou, P., Tian, F., Lv, F., and Shang, Z. (2009) Geometric characteristics of hydrogen bonds involving sulfur atoms in proteins. *Proteins Struct. Funct. Bioinforma.* *76*, 151–163.
- (74) Barends, T. R. M., Hartmann, E., Griese, J. J., Beitlich, T., Kirienko, N. V., Ryjenkov, D. A., Reinstein, J., Shoeman, R. L., Gomelsky, M., and Schlichting, I. (2009) Structure and mechanism of a bacterial light-regulated cyclic nucleotide phosphodiesterase. *Nature* *459*, 1015–1018.
- (75) Minasov, G., Padavattan, S., Shuvalova, L., Brunzelle, J. S., Miller, D. J., Baslé, A., Massa, C., Collart, F. R., Schirmer, T., and Anderson, W. F. (2009) Crystal Structures of YkuI and Its Complex with Second Messenger Cyclic Di-GMP Suggest Catalytic Mechanism of Phosphodiester Bond Cleavage by EAL Domains. *J. Biol. Chem.* *284*, 13174–13184.
- (76) Tchigvintsev, A., Xu, X., Singer, A., Chang, C., Brown, G., Proudfoot, M., Cui, H., Flick, R., Anderson, W. F., Joachimiak, A., Galperin, M. Y., Savchenko, A., and Yakunin, A. F. (2010) Structural Insight into the Mechanism of c-di-GMP Hydrolysis by EAL Domain Phosphodiesterases. *J. Mol. Biol.* *402*, 524–538.

**Figure 1.** c-di-AMP bound to macromolecular receptors (A) LmPC, (B) KtrA, and (C) PstA<sub>SA</sub> (ref. 32,33,37). c-di-AMP is colored by atom with carbon in white, oxygen in red, nitrogen in blue, and phosphorous in orange. Protein binding sites are shown as green cartoons. (D) Conformations adopted by c-di-AMP when bound to downstream targets (ref. 32,33,37,45-47). C-di-AMP is colored in green for *ydaO*, grey for PstA<sub>SA</sub>, orange for LmPC, and purple for KtrA. The structures are superimposed at a single adenosine, with the remaining atoms floating.

**Figure 2.** c-di-AMP recognition by the *ydaO* riboswitch (ref. 45-47). (A) Structure of the *ydaO* aptamer from *B. subtilis* bound to two molecules of c-di-AMP. c-di-AMP is colored in red. Conserved Watson-Crick G-C pairs involved in type-I A-minor interactions with c-di-AMP are shown in purple for Site 1 and green for Site 2. Bases that stack with the adenines are shown in blue. Important nucleotides are labeled. (B and C) c-di-AMP-A2 $\alpha$  recognition by the *ydaO* motif. c-di-AMP is colored by atom with carbon in white, oxygen in red, nitrogen in blue, and phosphorous in orange. Hydrogen-bonding nucleotides of *ydaO* are colored as described, with carbons in teal. Hydrogen bonds are shown as black dashed lines. (B) Recognition of the Watson-Crick and Hoogsteen faces of the c-di-AMP nucleobases featuring the type-1 A-minor interaction. (C) Backbone recognition of c-di-AMP by the *ydaO* riboswitch. These c-di-AMP recognition motifs are observed with each adenosine of the ligand.

**Figure 3.** K<sub>d</sub> measurements of c-di-AMP by gel-shift and its various analogs using the competition gel-shift assay with radiolabeled c-di-AMP. (A) Representative gel-shift experiment for measuring the K<sub>d</sub> of c-di-AMP for the *ydaO* RNA by direct binding. (B) c-di-AMP binding curve for the

*ydaO* riboswitch. (C) Representative competition gel-shift experiment. RNA, radiolabeled c-di-AMP, and increasing concentrations of competitor analog are incubated until equilibrium is achieved. Free c-di-AMP is separated from RNA-bound c-di-AMP by native PAGE. (D) Sample binding curve from the competition gel-shift assay with c-di-dAMP. Data are fit to an equation for competitive binding to determine the analog  $K_d$ .

**Figure 4.** Structures of c-di-AMP analogs used in this study. X indicates where modifications were made in each series. (A) Base, (B) Ribose, and Phosphate-modified analogs.

**Figure 5.** Monitoring the enzymatic hydrolysis of c-di-AMP by HPLC. (A) Domain architecture of GdpP-family proteins (1-659) and the protein construct used for enzymatic assay (84-659). (B) HPLC traces showing elution of pApA and c-di-AMP. Peaks corresponding to each of these compounds are labeled. After 60 min under the experimental conditions used, c-di-AMP is completely degraded. (C) The amount of pApA formed was measured to determine the initial velocity of c-di-AMP degradation. Analog degradation was measured and analyzed in the same manner.

**Figure 6.** Recognition and enzymatic hydrolysis of c-di-AMP by PDE proteins (ref. 28). (A) c-di-AMP bound to the active site of HD domain protein PgpH from *L. monocytogenes* (PDB entry 4S1B). c-di-AMP is colored by atom with carbon in white, oxygen in red, nitrogen in blue, and phosphorous in orange. Ligand binding residues are colored in purple, metal coordinating residues

are in green, and the catalytic histidine and aspartic acid are in cyan. Hydrogen-bonding interactions are shown as dashed lines (red) and metal-coordinating interactions are displayed as solid lines (black). Iron metals are shown as orange spheres and the nucleophilic water is a red sphere. (B) Proposed mechanism of c-di-AMP cleavage. In the presence of a PDE protein, a nucleophilic water molecule attacks one of the c-di-AMP phosphodiester bonds to produce the linear 5'-pApA.

**Figure 7.** Degradation of c-di-AMP by GdpP. (A) Steady-state kinetic analysis of the enzyme-catalyzed hydrolysis of c-di-AMP by GdpP<sub>84-659</sub>. (B) Fraction of pApA formed from degradation of radiolabeled c-di-AMP over time in the presence of unlabeled c-di-AMP analogs.
